# Supplementary material for: An Examination of Enhanced Atmospheric Methane Detection Methods for Predicting Performance of a Novel Multiband Uncooled Radiometer Imager
Source: Copernicus journal article supplement (doi:10.5194/amt-2020-53), 2020-04-09
Supplement: Supplementary file [file amt-2020-53-AC1-supplement.pdf]

# Supplemental Materials

Cody M Webber<sup>1</sup> and John P Kerekes<sup>1</sup>

<sup>1</sup>Digital Imaging and Remote Sensing Laboratory, Rochester Institute of Technology, Rochester, NY 14623, USA

**Correspondence:** Cody M Webber (cmw3698@rit.edu)

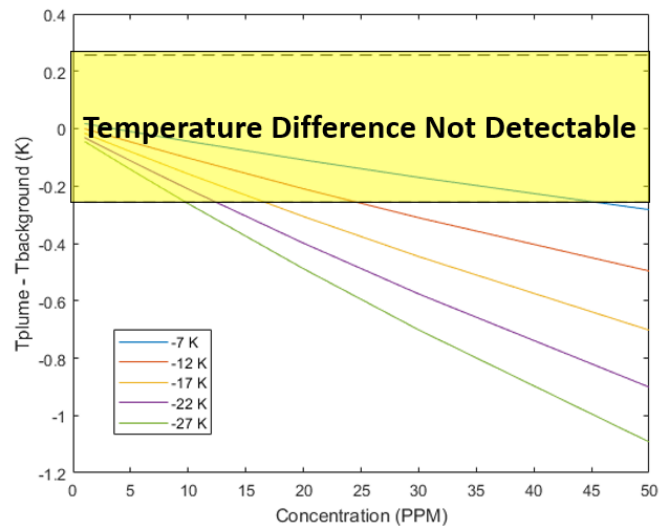

**SM- 1.** Recreation of Figure 5. Describes NEdT comparison study using temperature difference between the plume and the surface.

**ST- 1.** Area Under MURI Matched Filter ROC Curves (Figure 6)

| Concentration PPM # | Line Color | Area |
|---------------------|------------|------|
| 20                  | Black      | 0.97 |
| 15                  | Red        | 0.94 |
| 10                  | Blue       | 0.86 |
| 5                   | Pink       | 0.71 |
| 1                   | Cyan       | 0.55 |

**ST- 2.** Area Under MURI NDMI Band 1 and 2 ROC Curves (Figures 7)

| Concentration PPM # | Line Color | Area |
|---------------------|------------|------|
| 20                  | Black      | 0.86 |
| 15                  | Red        | 0.8  |
| 10                  | Blue       | 0.72 |
| 5                   | Pink       | 0.62 |
| 1                   | Cyan       | 0.52 |

**ST- 3.** Area Under MURI NDMI Band 1 and Band 6 ROC Curves (Figure 8)

| Concentration PPM # | Line Color | Area |
|---------------------|------------|------|
| 20                  | Black      | 0.98 |
| 15                  | Red        | 0.95 |
| 10                  | Blue       | 0.89 |
| 5                   | Pink       | 0.74 |
| 1                   | Cyan       | 0.55 |
